# Supplementary material for: Isorhamnetin, the xanthine oxidase inhibitor fromSophora japonica, ameliorates uric acid levels and renal function in hyperuricemic mice
Source: Royal Society of Chemistry journal article supplement (doi:10.1039/d1fo02719k), 2021-01-01
Supplement: d1fo02719k1.pdf [file d1fo02719k1.pdf]

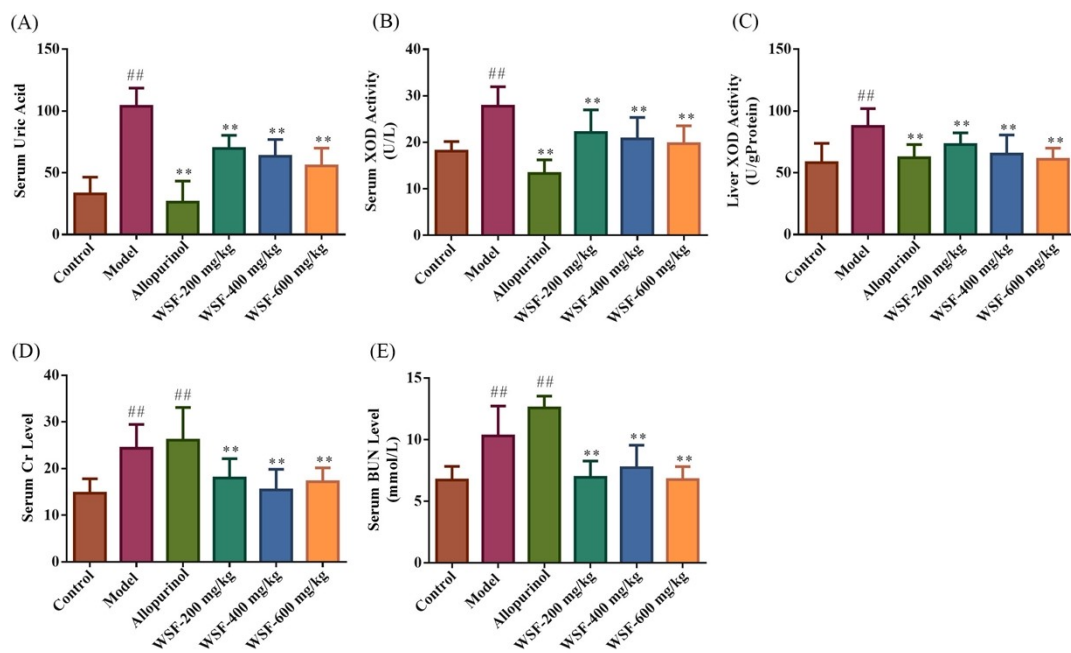

**Supplementary Fig. 1** Biochemical effects of WSF on hyperuricemic mice. (A) levels of UA in serum; (B) levels of XOD in serum; (C) levels of XOD in the liver; (D) levels of Cr in serum; (E) levels of BUN in serum. Data were expressed as mean  $\pm$  S.E.M. ( $n = 10$ ). <sup>#</sup> $p < 0.01$ , <sup>##</sup> $p < 0.01$ , compared with the control group; <sup>\*</sup> $p < 0.05$ , <sup>\*\*</sup> $p < 0.01$ , compared with the model group.

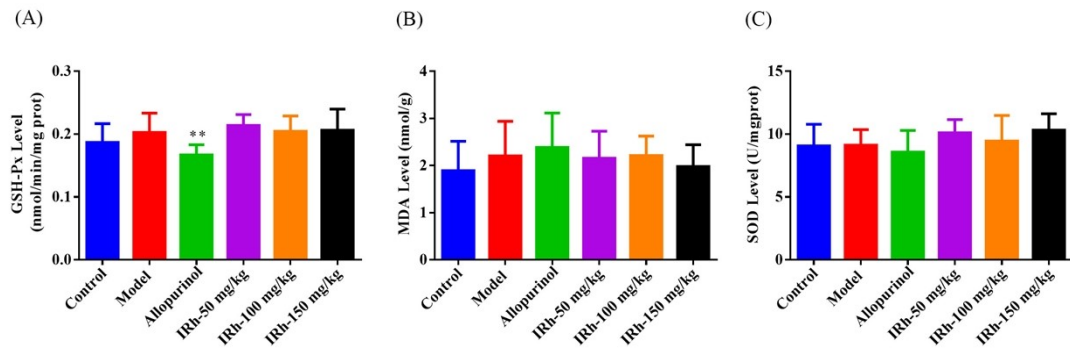

**Supplementary Fig. 2** Oxidative stress effects of IRh in hyperuricemic mice kidneys.

(A) GSH-Px levels; (B) MDA levels; (C) SOD levels. Data were expressed as mean  $\pm$  S.E.M. ( $n = 10$ ). \*\* $p < 0.01$ , compared with the model group.
